# Supplementary material
Source: MDPI journal article supplement (https://www.mdpi.com/1424-2818/12/10/391)
Supplement: s1 [file s1]

**Table S1.** Abiotic variables derived from point count surveys in the two seascape configuration categories.  $N_{\text{dense}} = 42$ ,  $N_{\text{sparse}} = 43$ .

|                | Dense (mean $\pm$ SE) | Sparse (mean $\pm$ SE) |
|----------------|-----------------------|------------------------|
| No of bommies  | 6.38 $\pm$ 0.46       | 4.00 $\pm$ 0.30        |
| Sand cover (%) | 30.83 $\pm$ 1.93      | 56.41 $\pm$ 2.80       |

**Table S2.** Mean values of focal bommie diameter in the two different seascape configuration categories.  $N_{\text{dense}} = 42$ ,  $N_{\text{sparse}} = 43$ .

|                     | Dense (mean $\pm$ SE) | Sparse (mean $\pm$ SE) |
|---------------------|-----------------------|------------------------|
| Bommie diameter (m) | 1.07 $\pm$ 0.08       | 0.95 $\pm$ 0.08        |

**Table S3.** Mean values  $\pm$  SE of fish abundance from point count surveys (19.625 m<sup>2</sup>). Letters in brackets indicate functional group; B: browser, C: corallivore, D: detritivore, G: grazer, I: invertivore, O: omnivore, P: piscivore, Pl: planktivore, S/E: scraper/excavator, TG: territorial grazer.

| Species                               | Lifestage | Abundance       | Species                                | Lifestage | Abundance       |
|---------------------------------------|-----------|-----------------|----------------------------------------|-----------|-----------------|
| <i>Abudefduf septemfasciatus</i> (O)  | AD        | 0.07 $\pm$ 0.03 | <i>Grammistes sexlineatus</i> (P)      | AD        | 0.01 $\pm$ 0.01 |
|                                       | JUV       | 0               |                                        | JUV       | 0               |
| <i>Abudefduf sexfasciatus</i> (Pl)    | AD        | 0.09 $\pm$ 0.04 | <i>Gymnothorax javanicus</i> (P)       | AD        | 0.01 $\pm$ 0.01 |
|                                       | JUV       | 0               |                                        | JUV       | 0               |
| <i>Acanthurus leucopareius</i> (G)    | AD        | 0               | <i>Gymnothorax sp.</i> (P)             | AD        | 0.01 $\pm$ 0.01 |
|                                       | JUV       | 0.01 $\pm$ 0.01 |                                        | JUV       | 0.01 $\pm$ 0.01 |
| <i>Acanthurus nigrofasciatus</i> (G)  | AD        | 1.12 $\pm$ 0.12 | <i>Halichoeres hortulanus</i> (I)      | AD        | 0.26 $\pm$ 0.06 |
|                                       | JUV       | 0               |                                        | JUV       | 0.19 $\pm$ 0.05 |
| <i>Acanthurus olivaceus</i> (D)       | AD        | 0.01 $\pm$ 0.01 | <i>Halichoeres trimaculatus</i> (I)    | AD        | 0.44 $\pm$ 0.09 |
|                                       | JUV       | 0               |                                        | JUV       | 0.78 $\pm$ 0.12 |
| <i>Acanthurus pyroferus</i> (G)       | AD        | 0.01 $\pm$ 0.01 | <i>Heniochus chrysostomus</i> (I)      | AD        | 0.02 $\pm$ 0.02 |
|                                       | JUV       | 0               |                                        | JUV       | 0               |
| <i>Acanthurus triostegus</i> (G)      | AD        | 0.07 $\pm$ 0.03 | <i>Labridae sp.</i> (I)                | AD        | 0.02 $\pm$ 0.02 |
|                                       | JUV       | 0.04 $\pm$ 0.02 |                                        | JUV       | 0.04 $\pm$ 0.02 |
| <i>Aulostomus chinensis</i> (P)       | AD        | 0.01 $\pm$ 0.01 | <i>Labroides bicolor</i> (I)           | AD        | 0               |
|                                       | JUV       | 0               |                                        | JUV       | 0.02 $\pm$ 0.02 |
| <i>Balistapus undulatus</i> (I)       | AD        | 0.1 $\pm$ 0.04  | <i>Labroides dimidiatus</i> (I)        | AD        | 0.01 $\pm$ 0.01 |
|                                       | JUV       | 0               |                                        | JUV       | 0.01 $\pm$ 0.01 |
| <i>Bothus pantherinus</i> (I)         | AD        | 0.01 $\pm$ 0.01 | <i>Leptoscarus vaigiensis</i> (B)      | AD        | 0.01 $\pm$ 0.01 |
|                                       | JUV       | 0               |                                        | JUV       | 0               |
| <i>Canthigaster janthinoptera</i> (O) | AD        | 0.05 $\pm$ 0.02 | <i>Lutjanus fulvus</i> (I)             | AD        | 0.05 $\pm$ 0.02 |
|                                       | JUV       | 0.01 $\pm$ 0.01 |                                        | JUV       | 0               |
| <i>Canthigaster solandri</i> (O)      | AD        | 0.01 $\pm$ 0.01 | <i>Monotaxis grandoculis</i> (I)       | AD        | 0.01 $\pm$ 0.01 |
|                                       | JUV       | 0.01 $\pm$ 0.01 |                                        | JUV       | 0               |
| <i>Canthigaster valentini</i> (O)     | AD        | 0               | <i>Myripristis sp.</i> (I)             | AD        | 0.02 $\pm$ 0.02 |
|                                       | JUV       | 0.02 $\pm$ 0.02 |                                        | JUV       | 0               |
| <i>Caranx melampygus</i> (P)          | AD        | 0.01 $\pm$ 0.01 | <i>Myripristis violacea</i> (Pl)       | AD        | 0.01 $\pm$ 0.01 |
|                                       | JUV       | 0               |                                        | JUV       | 0.01 $\pm$ 0.01 |
| <i>Carcharhinus melanopterus</i> (P)  | AD        | 0.01 $\pm$ 0.01 | <i>Neoniphon sammara</i> (I)           | AD        | 0.01 $\pm$ 0.01 |
|                                       | JUV       | 0               |                                        | JUV       | 0.01 $\pm$ 0.01 |
| <i>Centropyge flavissima</i> (O)      | AD        | 0.16 $\pm$ 0.04 | <i>Ostorhinchus nigrofasciatus</i> (I) | AD        | 0.05 $\pm$ 0.02 |
|                                       | JUV       | 0.1 $\pm$ 0.04  |                                        | JUV       | 0.04 $\pm$ 0.03 |
| <i>Cephalopholis argus</i> (P)        | AD        | 0.06 $\pm$ 0.03 | <i>Paracirrhites bicolor</i> (I)       | AD        | 0.01 $\pm$ 0.01 |
|                                       | JUV       | 0               |                                        | JUV       | 0               |
| <i>Chaetodon auriga</i> (O)           | AD        | 0.02 $\pm$ 0.02 | <i>Parapercis millepunctata</i> (I)    | AD        | 0.07 $\pm$ 0.03 |
|                                       | JUV       | 0               |                                        | JUV       | 0               |
| <i>Chaetodon citrinellus</i> (O)      | AD        | 0.13 $\pm$ 0.03 | <i>Parupeneus ciliatus</i> (I)         | AD        | 0.01 $\pm$ 0.01 |
|                                       | JUV       | 0.11 $\pm$ 0.03 |                                        | JUV       | 0               |

|                                           |     |             |                                       |     |             |
|-------------------------------------------|-----|-------------|---------------------------------------|-----|-------------|
| <i>Chaetodon lunula</i> (O)               | AD  | 0.01 ± 0.01 | <i>Parupeneus multifasciatus</i> (I)  | AD  | 0.04 ± 0.02 |
|                                           | JUV | 0.01 ± 0.01 |                                       | JUV | 0           |
| <i>Chaetodon lunulatus</i> (C)            | AD  | 0.1 ± 0.04  | <i>Pomacentrus coelestis</i> (O)      | AD  | 0.17 ± 0.05 |
|                                           | JUV | 0.02 ± 0.02 |                                       | JUV | 0.15 ± 0.05 |
| <i>Chaetodon ornatissimus</i> (C)         | AD  | 0.04 ± 0.03 | <i>Pristiapogon fraenatus</i> (I)     | AD  | 0.04 ± 0.02 |
|                                           | JUV | 0           |                                       | JUV | 0.02 ± 0.02 |
| <i>Chaetodon vagabundus</i> (O)           | AD  | 0.1 ± 0.04  | <i>Pseudocheilinus hexataenia</i> (I) | AD  | 0           |
|                                           | JUV | 0           |                                       | JUV | 0.09 ± 0.03 |
| <i>Cheilinus chlorurus</i> (I)            | AD  | 0.12 ± 0.04 | <i>Rhinecanthus acuelatus</i> (I)     | AD  | 0.01 ± 0.01 |
|                                           | JUV | 0.02 ± 0.02 |                                       | JUV | 0.01 ± 0.01 |
| <i>Cheilinus trilobatus</i> (I)           | AD  | 0.01 ± 0.01 | <i>Sargocentron diadema</i> (I)       | AD  | 0.04 ± 0.03 |
|                                           | JUV | 0           |                                       | JUV | 0           |
| <i>Cheilodipterus quinquelineatus</i> (I) | AD  | 0.02 ± 0.02 | <i>Sargocentron microstoma</i> (I)    | AD  | 0.02 ± 0.02 |
|                                           | JUV | 0.05 ± 0.03 |                                       | JUV | 0           |
| <i>Chlorurus spilurus</i> (S/E)           | AD  | 0.83 ± 0.17 | <i>Sargocentron sp.</i> (I)           | AD  | 0.01 ± 0.01 |
|                                           | JUV | 0.55 ± 0.12 |                                       | JUV | 0           |
| <i>Chromis leucura</i> (O)                | AD  | 0.01 ± 0.01 | <i>Saurida gracilis</i> (P)           | AD  | 0.01 ± 0.01 |
|                                           | JUV | 0           |                                       | JUV | 0           |
| <i>Chromis margaritifer</i> (O)           | AD  | 0.05 ± 0.02 | <i>Saurida nebulosa</i> (P)           | AD  | 0.02 ± 0.02 |
|                                           | JUV | 0.02 ± 0.02 |                                       | JUV | 0           |
| <i>Chromis viridis</i> (Pl)               | AD  | 0.02 ± 0.02 | <i>Scarus altipinnis</i> (S/E)        | AD  | 0           |
|                                           | JUV | 0           |                                       | JUV | 0.04 ± 0.02 |
| <i>Chrysiptera brownriggii</i> (O)        | AD  | 0.32 ± 0.06 | <i>Scarus globiceps</i> (S/E)         | AD  | 0.31 ± 0.08 |
|                                           | JUV | 0.3 ± 0.06  |                                       | JUV | 0.04 ± 0.04 |
| <i>Ctenochaetus striatus</i> (D)          | AD  | 1.71 ± 0.19 | <i>Scarus niger</i> (S/E)             | AD  | 0           |
|                                           | JUV | 0.12 ± 0.04 |                                       | JUV | 0.01 ± 0.01 |
| <i>Ctenogobiops feroculus</i> (I)         | AD  | 0.06 ± 0.03 | <i>Scarus oviceps</i> (S/E)           | AD  | 0.01 ± 0.01 |
|                                           | JUV | 0.05 ± 0.03 |                                       | JUV | 0.01 ± 0.01 |
| <i>Dascyllus aruanus</i> (Pl)             | AD  | 0.02 ± 0.02 | <i>Scarus psittacus</i> (S/E)         | AD  | 0.07 ± 0.03 |
|                                           | JUV | 0.04 ± 0.03 |                                       | JUV | 0           |
| <i>Dascyllus flavicaudus</i> (Pl)         | AD  | 0.02 ± 0.02 | <i>Scarus sp</i> (S/E)                | AD  | 0.4 ± 0.09  |
|                                           | JUV | 0           |                                       | JUV | 1.35 ± 0.26 |
| <i>Dascyllus trimaculatus</i> (O)         | AD  | 0.02 ± 0.02 | <i>Scorpaenopsis sp.</i> (P)          | AD  | 0           |
|                                           | JUV | 0           |                                       | JUV | 0.02 ± 0.02 |
| <i>Epinephelus merra</i> (P)              | AD  | 0.05 ± 0.02 | <i>Siganus spinus</i> (B)             | AD  | 0.04 ± 0.02 |
|                                           | JUV | 0           |                                       | JUV | 0.09 ± 0.04 |
| <i>Eviota guttata</i> (I)                 | AD  | 0.02 ± 0.02 | <i>Stegastes nigricans</i> (TR)       | AD  | 1.16 ± 0.26 |
|                                           | JUV | 0           |                                       | JUV | 0.63 ± 0.09 |
| <i>Eviota hinanoe</i> (I)                 | AD  | 0.01 ± 0.01 | <i>Stethojulis bandanensis</i> (I)    | AD  | 0.19 ± 0.05 |
|                                           | JUV | 0           |                                       | JUV | 0.91 ± 0.14 |
| <i>Fusigobius neophytus</i> (I)           | AD  | 0.01 ± 0.01 | <i>Thalassoma hardwicke</i> (I)       | AD  | 1.37 ± 0.23 |
|                                           | JUV | 0.01 ± 0.01 |                                       | JUV | 0.83 ± 0.13 |
| <i>Fusigobius sp.</i> (I)                 | AD  | 0.01 ± 0.01 | <i>Valencienna strigata</i> (I)       | AD  | 0.02 ± 0.02 |
|                                           | JUV | 0           |                                       | JUV | 0           |
| <i>Glyptoparus delicatulus</i> (G)        | AD  | 0.01 ± 0.01 | <i>Zanclus cornutus</i> (I)           | AD  | 0.01 ± 0.01 |
|                                           | JUV | 0.05 ± 0.04 |                                       | JUV | 0           |
| <i>Glyptoparus sp.</i> (G)                | AD  | 0           | <i>Zebrasoma scopas</i> (G)           | AD  | 0.35 ± 0.07 |
|                                           | JUV | 0.01 ± 0.01 |                                       | JUV | 0.06 ± 0.04 |
| <i>Gnatholepis anjerensis</i> (O)         | AD  | 0.15 ± 0.04 |                                       |     |             |
|                                           | JUV | 0.01 ± 0.01 |                                       |     |             |
| <i>Gnatholepis sp.</i> (O)                | AD  | 0.1 ± 0.04  |                                       |     |             |
|                                           | JUV | 0.01 ± 0.01 |                                       |     |             |
| <i>Gobiidae sp.</i> (I)                   | AD  | 0.16 ± 0.04 |                                       |     |             |
|                                           | JUV | 0.02 ± 0.02 |                                       |     |             |
| <i>Gomphosus varius</i> (I)               | AD  | 0.01 ± 0.01 |                                       |     |             |
|                                           | JUV | 0.01 ± 0.01 |                                       |     |             |

**Table S4.** Summary statistics from ANOVA models of the interactive effects of seascape configuration (dense versus sparse bommies), bommie height (short or tall), and the presence/absence of macroalgae on the abundances of all fishes and on herbivorous fishes.

|                                                             | Df | MS    | F-value | p-value |
|-------------------------------------------------------------|----|-------|---------|---------|
| <b>Total fish abundance</b>                                 |    |       |         |         |
| Configuration x Bommie height                               | 1  | 3.919 | 0.114   | 0.737   |
| Configuration x Macroalgal presence/absence                 | 1  | 4.420 | 0.106   | 0.745   |
| Bommie height x Macroalgal presence/absence                 | 1  | 0.337 | 1.348   | 0.249   |
| Configuration x Bommie height x Macroalgal presence/absence | 1  | 0.003 | 0.012   | 0.915   |
| Residuals                                                   | 78 | 0.250 |         |         |
| <b>Herbivorous fish abundance</b>                           |    |       |         |         |
| Configuration x Bommie height                               | 1  | 0.02  | 0.023   | 0.880   |
| Configuration x Macroalgal presence/absence                 | 1  | 0.747 | 0.724   | 0.397   |
| Bommie height x Macroalgal presence/absence                 | 1  | 0.26  | 0.250   | 0.619   |
| Configuration x Bommie height x Macroalgal presence/absence | 1  | 0.027 | 0.026   | 0.872   |
| Residuals                                                   | 77 | 1.031 |         |         |

**Table 5.** Summary statistics from ANOVA models of the interactive effects of seascape configuration (dense versus sparse bommies), bommie height (short or tall), and the presence/absence of macroalgae on the abundances of adult and juvenile parrotfishes.

|                                                             | Df | MS    | F     | p – value |
|-------------------------------------------------------------|----|-------|-------|-----------|
| <b>Abundance adult parrotfishes</b>                         |    |       |       |           |
| Configuration x Bommie height                               | 1  | 1.124 | 1.407 | 0.239     |
| Configuration x Macroalgal presence/absence                 | 1  | 0.038 | 0.048 | 0.827     |
| Bommie height x Macroalgal presence/absence                 | 1  | 0.767 | 0.960 | 0.330     |
| Configuration x Bommie height x Macroalgal presence/absence | 1  | 0.005 | 0.006 | 0.937     |
| Residuals                                                   | 77 | 0.798 |       |           |
| <b>Abundance juvenile parrotfishes</b>                      |    |       |       |           |
| Configuration x Bommie height                               | 1  | 0.498 | 0.486 | 0.488     |
| Configuration x Macroalgal presence/absence                 | 1  | 0.851 | 0.829 | 0.365     |
| Bommie height x Macroalgal presence/absence                 | 1  | 0.960 | 0.935 | 0.336     |
| Configuration x Bommie height x Macroalgal presence/absence | 1  | 0.019 | 0.018 | 0.893     |
| Residuals                                                   | 77 | 1.026 |       |           |

**Table 6.** ANOVA-table of mean distance travelled per min, by *C. spilurus* in different habitat types and size classes (n = 53). Numbers in bold indicate significant p - values (p < 0.05).

|                                     | Df | MS    | F     | p – value |
|-------------------------------------|----|-------|-------|-----------|
| Bommie configuration (dense/sparse) | 1  | 1.291 | 2.457 | 0.123     |
| Bommie height                       | 1  | 1.130 | 2.150 | 0.149     |

|                       |    |       |       |              |
|-----------------------|----|-------|-------|--------------|
| Life stage/size class | 1  | 2.445 | 4.652 | <b>0.036</b> |
| Residuals             | 49 | 0.526 |       |              |

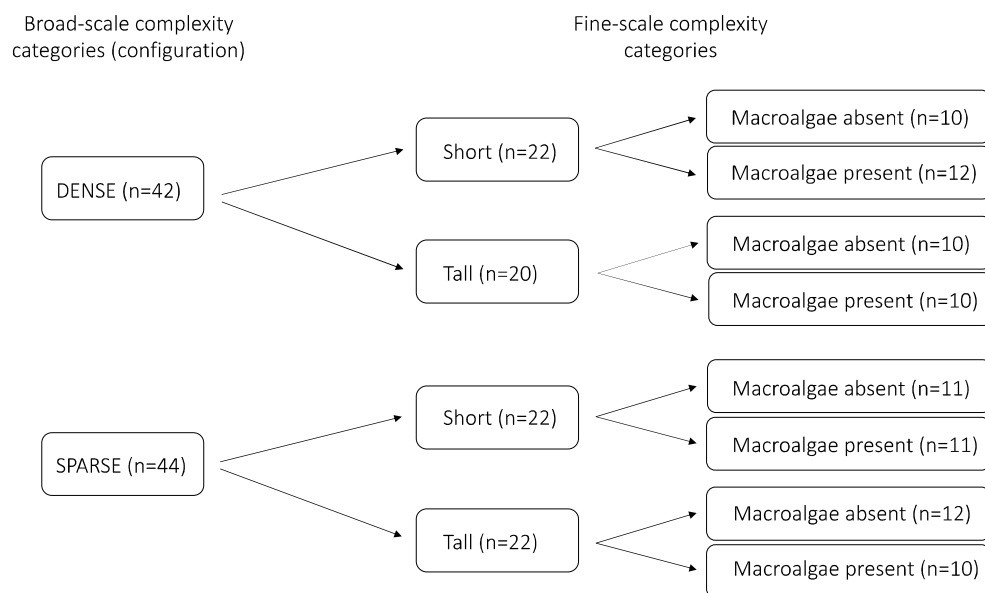

**Figure 1.** Schematic of the complexity categories at different scales and the number of point count surveys in each.

a).

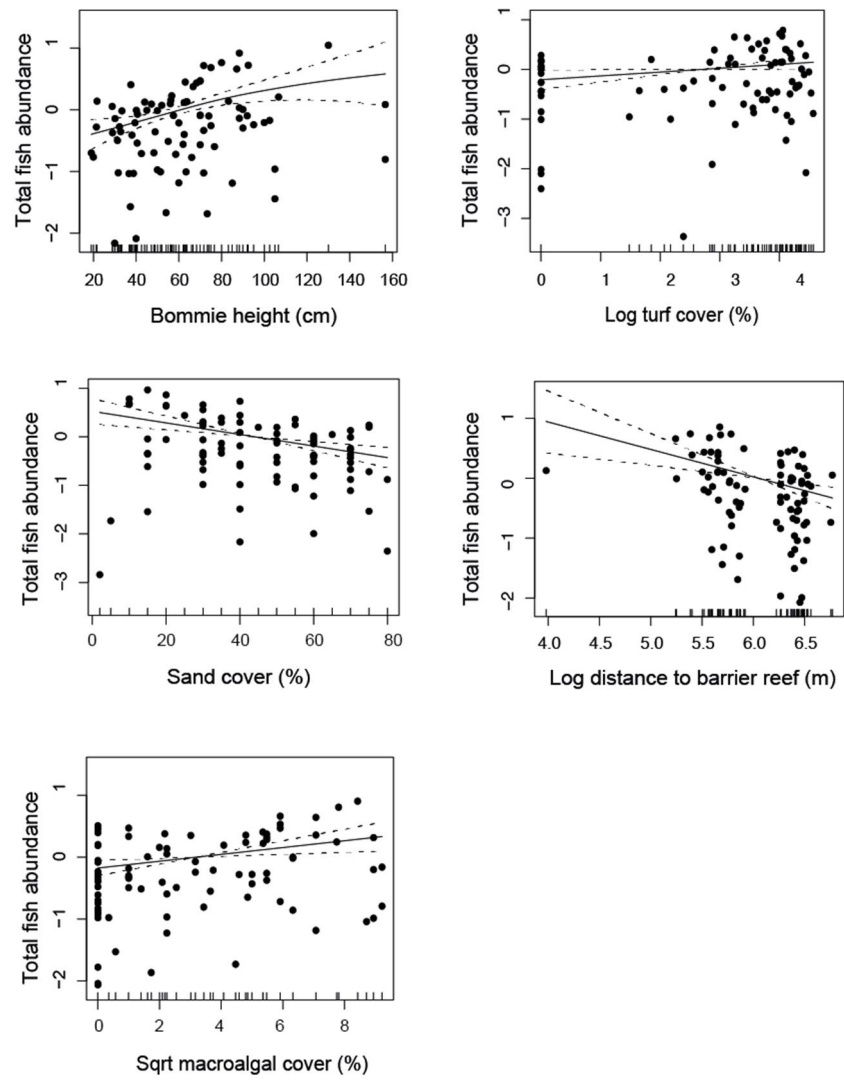

b).

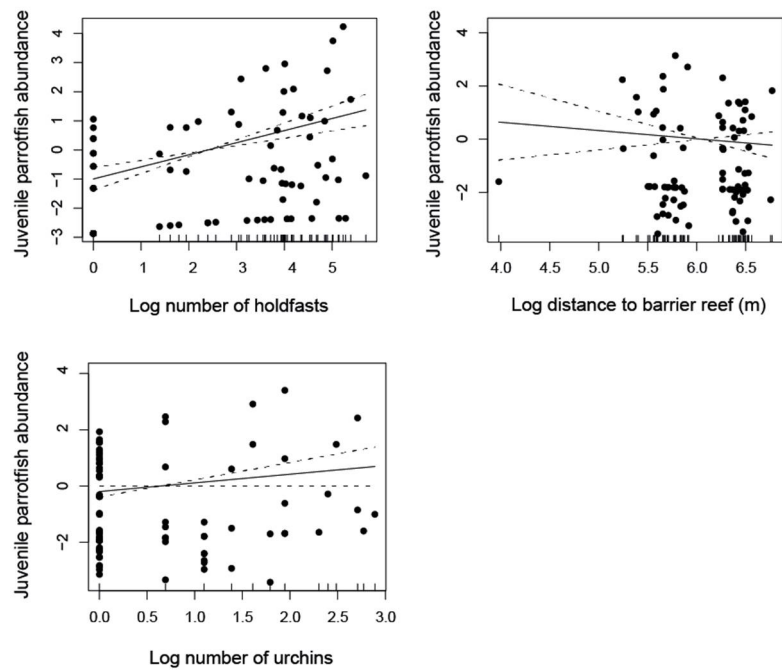

c).

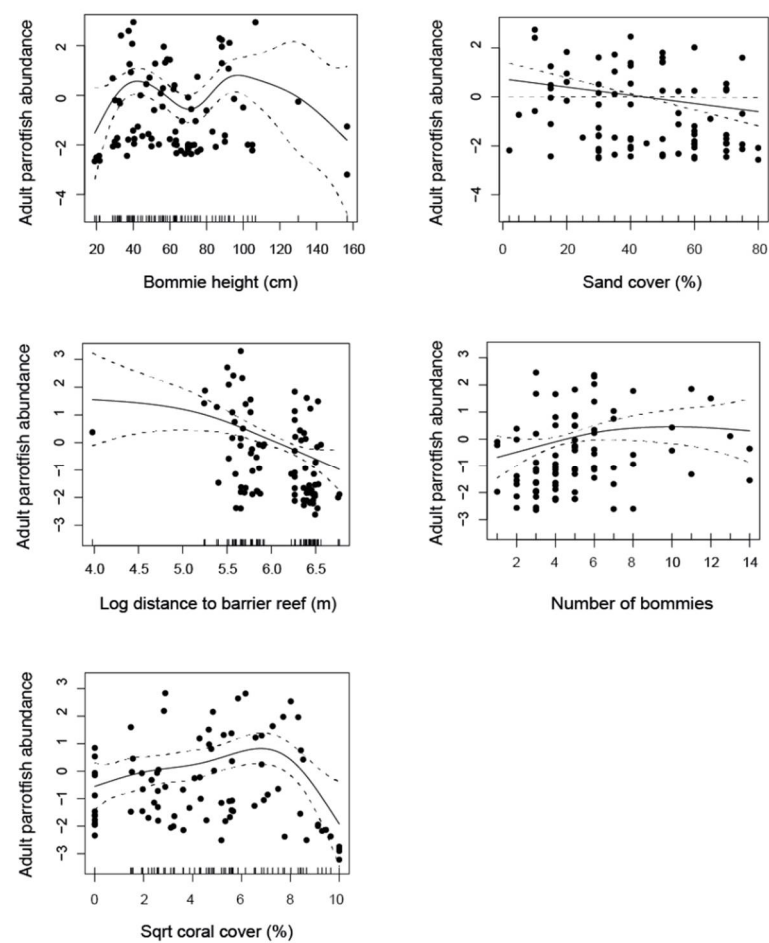

---

**Figure 2.** Plots showing variables included in the most parsimonious GAM models for explaining fish abundance a) total fish b) juvenile parrotfish and c) adult parrotfish.
